## Supporting Information

**S1 Table. eQTL Analysis**

| SNP ID            | SNP Chr | SNP Type | Allele Assessed | Gene Symbol | P-Value         | Z-score | Beta size | Tissue   | Reference                 |
|-------------------|---------|----------|-----------------|-------------|-----------------|---------|-----------|----------|---------------------------|
| rs2472299*        | 15      | G/A      | A               | <b>CSK</b>  | <b>3.55E-34</b> | 12.19   |           | Blood    | Fehrmann et al, 2011 [1]  |
| rs2472299*        | 15      | G/A      | A               | ULK3        | 6.55E-18        | 8.62    |           | Blood    |                           |
| <b>rs1378942*</b> | 15      | A/C      | C               | <b>CSK</b>  | <b>1.97E-45</b> | 14.15   |           | Blood    |                           |
| <b>rs1378942*</b> | 15      | A/C      | C               | ULK3        | 3.17E-17        | 8.44    |           | Blood    |                           |
| rs2301249         | 15      | G/A      | A               | <b>CSK</b>  | <b>4.77E-39</b> | 13.07   |           | Blood    |                           |
| rs2301249         | 15      | G/A      | A               | ULK3        | 5.97E-23        | 9.86    |           | Blood    |                           |
| rs6495122*        | 15      | A/C      | C               | <b>CSK</b>  | <b>1.04E-25</b> | -10.48  |           | Blood    |                           |
| rs6495122*        | 15      | A/C      | C               | ULK3        | 1.51E-10        | -6.40   |           | Blood    |                           |
| rs6495122*        | 15      | A/C      | C               | SCAMP2      | 4.51E-10        | 6.24    |           | Blood    |                           |
| rs2472299*        | 15      | G/A      | G               | CYP1A2      | 6.73E-02        |         | -0.01027  | LCL      |                           |
| rs2472299*        | 15      | G/A      | G               | CSK         | 4.25E-10        |         | -0.07390  | LCL      |                           |
| rs2472299*        | 15      | G/A      | G               | LMAN1L      | 7.63E-01        |         | -0.00247  | LCL      |                           |
| rs2472299*        | 15      | G/A      | G               | CPLX3       | 1.83E-01        |         | 0.00740   | LCL      |                           |
| rs2472299*        | 15      | G/A      | G               | <b>ULK3</b> | <b>3.06E-22</b> |         | -0.11280  | LCL      |                           |
| rs2472299*        | 15      | G/A      | G               | SCAMP2      | 2.11E-01        |         | 0.02001   | LCL      |                           |
| <b>rs1378942*</b> | 15      | A/C      | C               | CYP1A2      | 1.64E-01        |         | 0.00757   | LCL      |                           |
| <b>rs1378942*</b> | 15      | A/C      | C               | CSK         | 2.39E-13        |         | 0.08420   | LCL      |                           |
| <b>rs1378942*</b> | 15      | A/C      | C               | LMAN1L      | 8.09E-01        |         | -0.00191  | LCL      |                           |
| <b>rs1378942*</b> | 15      | A/C      | C               | CPLX3       | 4.71E-01        |         | -0.00388  | LCL      |                           |
| <b>rs1378942*</b> | 15      | A/C      | C               | <b>ULK3</b> | <b>1.04E-20</b> |         | 0.10530   | LCL      |                           |
| <b>rs1378942*</b> | 15      | A/C      | C               | SCAMP2      | 1.67E-02        |         | -0.03717  | LCL      |                           |
| rs2301249         | 15      | C/T      | T               | CYP1A2      | 2.11E-01        |         | 0.00710   | LCL      | Grundberg et al, 2012 [2] |
| rs2301249         | 15      | C/T      | T               | CSK         | 3.55E-11        |         | 0.07920   | LCL      |                           |
| rs2301249         | 15      | C/T      | T               | LMAN1L      | 4.46E-01        |         | 0.00632   | LCL      |                           |
| rs2301249         | 15      | C/T      | T               | CPLX3       | 2.01E-01        |         | -0.00717  | LCL      |                           |
| rs2301249         | 15      | C/T      | T               | <b>ULK3</b> | <b>2.93E-24</b> |         | 0.11950   | LCL      |                           |
| rs2301249         | 15      | C/T      | T               | SCAMP2      | 4.24E-02        |         | -0.03283  | LCL      |                           |
| rs7085            | 15      | T/C      | T               | CYP1A2      | 2.07E-01        |         | 0.00718   | LCL      |                           |
| rs7085            | 15      | T/C      | T               | CSK         | 3.80E-11        |         | 0.07920   | LCL      |                           |
| rs7085            | 15      | T/C      | T               | LMAN1L      | 4.48E-01        |         | 0.00632   | LCL      |                           |
| rs7085            | 15      | T/C      | T               | CPLX3       | 2.03E-01        |         | -0.00715  | LCL      |                           |
| rs7085            | 15      | T/C      | T               | <b>ULK3</b> | <b>3.06E-24</b> |         | 0.11970   | LCL      |                           |
| rs7085            | 15      | T/C      | T               | SCAMP2      | 4.04E-02        |         | -0.03323  | LCL      |                           |
| rs6495122*        | 15      | A/C      | C               | CYP1A2      | 1.39E-01        |         | -0.00772  | LCL      |                           |
| rs6495122*        | 15      | A/C      | C               | CSK         | 1.16E-10        |         | -0.07100  | LCL      |                           |
| rs6495122*        | 15      | A/C      | C               | LMAN1L      | 7.49E-01        |         | 0.00244   | LCL      |                           |
| rs6495122*        | 15      | A/C      | C               | CPLX3       | 5.88E-01        |         | 0.00280   | LCL      |                           |
| rs6495122*        | 15      | A/C      | C               | <b>ULK3</b> | <b>6.78E-17</b> |         | -0.09020  | LCL      |                           |
| rs6495122*        | 15      | A/C      | C               | SCAMP2      | 6.55E-04        |         | 0.05077   | LCL      |                           |
| rs2472299*        | 15      | A/G      |                 | <b>ULK3</b> | <b>2.16E-38</b> |         |           | Monocyte | Zeller et al,             |

|                   |    |     |   |             |                  |        |          |                        |
|-------------------|----|-----|---|-------------|------------------|--------|----------|------------------------|
| <b>rs1378942*</b> | 15 | C/A |   | <b>ULK3</b> | <b>3.21E-35</b>  |        | Monocyte | 2010 [3]               |
| <b>rs1378942*</b> | 15 | A/C | C | <b>CSK</b>  | <b>1.27E-129</b> | 24.22  | Blood    |                        |
| <b>rs1378942*</b> | 15 | A/C | C | ULK3        | 5.71E-33         | 11.96  | Blood    |                        |
| <b>rs1378942*</b> | 15 | A/C | C | SCAMP2      | 3.27E-06         | -4.65  | Blood    |                        |
| rs7085            | 15 | C/T | T | <b>CSK</b>  | <b>1.55E-131</b> | 24.40  | Blood    | Westra et al, 2013 [4] |
| rs7085            | 15 | C/T | T | ULK3        | 2.48E-48         | 14.61  | Blood    |                        |
| rs6495122*        | 15 | C/A | C | <b>CSK</b>  | <b>1.56E-79</b>  | -18.88 | Blood    |                        |
| rs6495122*        | 15 | C/A | C | ULK3        | 3.44E-23         | -9.92  | Blood    |                        |
| rs6495122*        | 15 | C/A | C | SCAMP2      | 7.52E-25         | 10.29  | Blood    |                        |

\*These SNPs have been previously reported and cataloged by National Human Genome Research Institute as in S3 Table.

None of SNPs that are in LD ( $r^2 > 0.80$ ) with rs1378942 has been reported for eQTL (S2 Table).

|                                                     |                                                                                                                        |
|-----------------------------------------------------|------------------------------------------------------------------------------------------------------------------------|
| <b>Study</b>                                        | Fehrmann et al, 2011                                                                                                   |
| <b>Population</b>                                   | United Kingdom, Netherlands / N=1,469                                                                                  |
| <b>Genotype</b>                                     | NCBI36.3 / Illumina HumanHap300 Quad platform / chr1-23 (MAF > 5%; call-rate > 95%)                                    |
| <b>Expression / Tissue</b>                          | Illumina HumanRef-8 v2, HT-12 v3 / Peripheral blood                                                                    |
| <b>eQTL Analysis on 289,044 common SNPs</b>         | Spearman's correlation P-value threshold: < 1.73E-3 for <i>cis</i> -eQTLs (FDR < 0.05) / 250 Kb for <i>cis</i> -radius |
| <b>eQTL Analysis on 1,167 trait-associated SNPs</b> | Spearman's correlation P-value threshold: < 3.7E-3 for <i>cis</i> -eQTLs (FDR < 0.05) / 250 Kb for <i>cis</i> -radius  |

MAF, minor allele frequency; FDR, false discovery rate

|                            |                                                              |
|----------------------------|--------------------------------------------------------------|
| <b>Study</b>               | Grundberg et al, 2012 / MuTHER Resource / www.muther.ac.uk   |
| <b>Population</b>          | United Kingdom / N=837                                       |
| <b>Genotype</b>            | NCBI36 / HapMap2 Imputation / chr1-23 (MAF > 5%; INFO > 0.8) |
| <b>Expression / Tissue</b> | Illumina HumanHT-12 v3 / Lymphoblastoid cell line (LCL)      |
| <b>eQTL Analysis</b>       | MuTHER format (FDR < 0.01) / 1 Mb for <i>cis</i> -radius     |

|                            |                                                                                 |
|----------------------------|---------------------------------------------------------------------------------|
| <b>Study</b>               | Zeller et al, 2010                                                              |
| <b>Population</b>          | Germany, Gutenberg Heart Study (GHS) / N=1,490                                  |
| <b>Genotype</b>            | NCBI36.3 / Affymetrix 6.0 array / chr1-23 (MAF > 1%, call rate > 98%, FDR > 1%) |
| <b>Expression / Tissue</b> | Illumina Human HT-12 v3 / Monocytes                                             |
| <b>eQTL Analysis</b>       | P-value threshold: < 5.78E-12 for eQTL / 1 Mb for <i>cis</i> -radius            |

|                            |                                                                                                                       |
|----------------------------|-----------------------------------------------------------------------------------------------------------------------|
| <b>Study</b>               | Westra et al, 2013                                                                                                    |
| <b>Population</b>          | European, 7 cohorts / N=5,311                                                                                         |
| <b>Genotype</b>            | NCBI36.3 / multiple genotyping platforms & Imputation / chr1-23 (MAF > 5%, Hardy-Weinberg equilibrium P value >0.001) |
| <b>Expression / Tissue</b> | Illumina Human HT-12v3, HT12v4, H8v2 / Peripheral blood                                                               |
| <b>eQTL Analysis</b>       | FDR < 0.05 for eQTL / 250 Kb for <i>cis</i> -radius                                                                   |

1. Fehrmann RS, Jansen RC, Veldink JH, Westra HJ, Arends D, Bonder MJ, *et al.* Trans-eqtls reveal that independent genetic variants associated with a complex phenotype converge on intermediate genes, with a major role for the hla. *PLoS genetics*. 2011;7:e1002197

2. Grundberg E, Small KS, Hedman AK, Nica AC, Buil A, Keildson S, *et al.* Mapping cis- and trans-regulatory effects across multiple tissues in twins. *Nature genetics.* 2012;44:1084-1089
3. Zeller T, Wild P, Szymczak S, Rotival M, Schillert A, Castagne R, *et al.* Genetics and beyond--the transcriptome of human monocytes and disease susceptibility. *PloS one.* 2010;5:e10693
4. Westra HJ, Peters MJ, Esko T, Yaghootkar H, Schurmann C, Kettunen J, *et al.* Systematic identification of trans eqtls as putative drivers of known disease associations. *Nature genetics.* 2013;45:1238-1243
