# Supplementary material for: Gene Silencing and Haploinsufficiency of Csk Increase Blood Pressure
Source: PLOS journal article supplement (doi:10.1371/journal.pone.0146841), 2016-01-11
Supplement: S1 (10.1371/journal.pone.0146841.s001) [file journal.pone.0146841.s001]

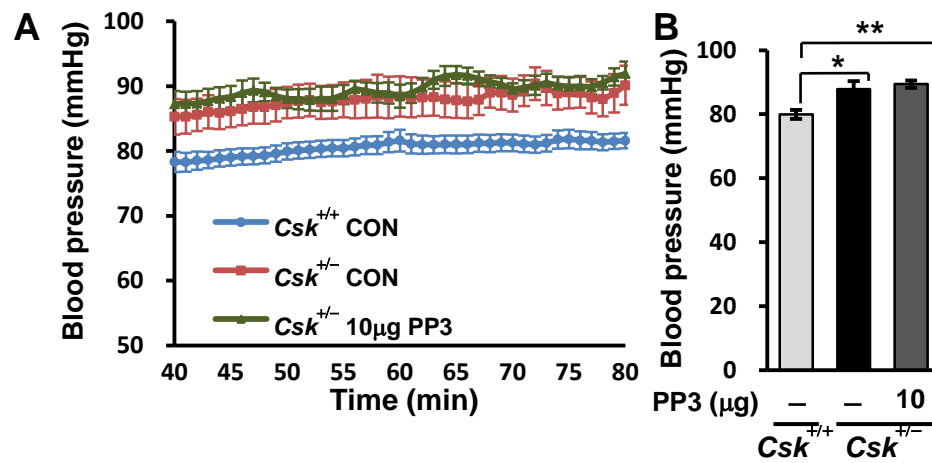

**S1 Fig. No effect on blood pressure by PP3 in *Csk*<sup>+/+</sup> and *Csk*<sup>+/-</sup> mice.** (A and B) *Csk*<sup>+/-</sup> and *Csk*<sup>+/+</sup> mice were i.p. injected with DMSO as control (CON) or PP3 (10 μg per kg body weight), a negative control for PP2, and blood pressure was measured 24 hours after injections.
